# Supplementary material
Source: Springer Nature journal article supplement (https://www.springermedizin.de/resource/supplementary/12985_2010_1039_MOESM5_ESM.pdf/9609012)

A.

**Amplification Curves**

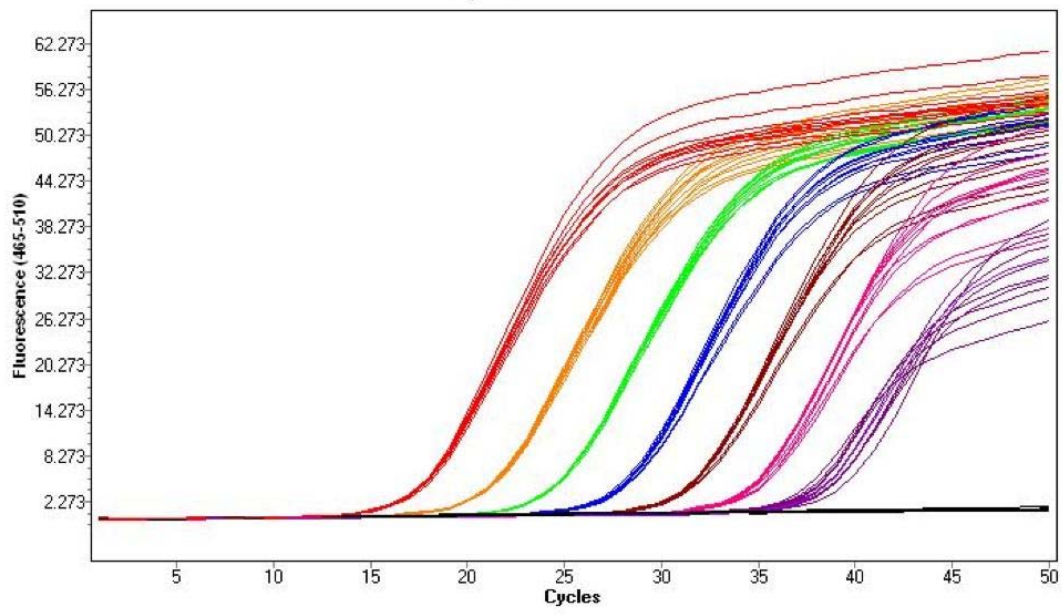

B.

**Standard Curve**

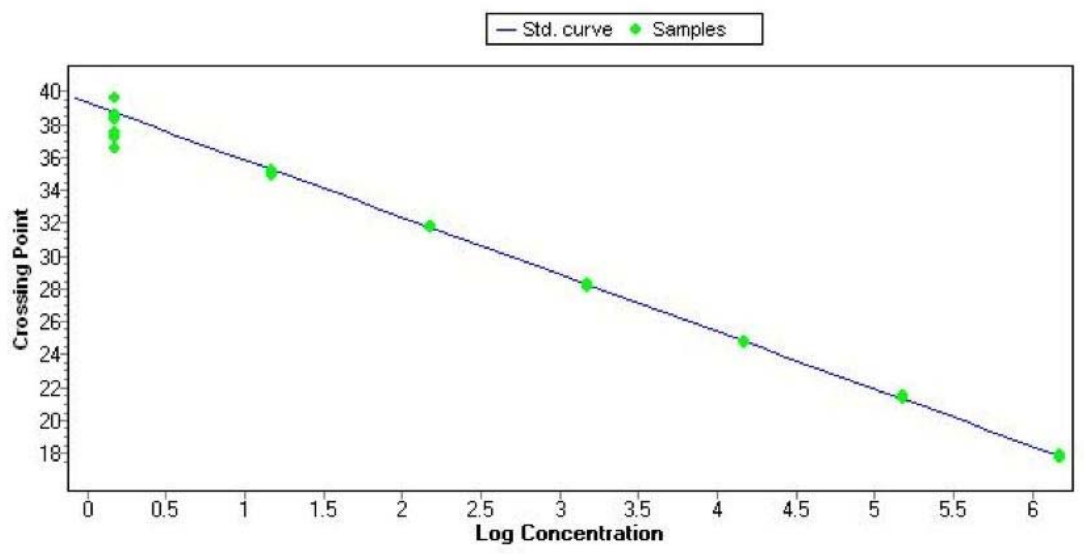

Supplement: MOESM5 [file 9609012]
